# Supplementary material for: AOPs enhance the migration of polystyrene nanoparticles in saturated quartz sand
Source: Royal Society of Chemistry journal article supplement (doi:10.1039/d1em00240f), 2021-01-01
Supplement: d1em00240f1.pdf [file d1em00240f1.pdf]

# AOPs enhance the migration of polystyrene nanoparticles in saturated quartz sand

Kai-Xin Zhang <sup>a</sup>, Chao Song <sup>a, b \*</sup>, Shan Zhao <sup>a</sup>, Zhen Yan <sup>a</sup>, Li-Juan Feng <sup>c</sup>, Shu-Guang Wang <sup>a</sup>

<sup>a</sup> *Shandong Key Laboratory of Water Pollution Control and Resource Reuse, School of Environmental Science and Engineering, Shandong University, Qingdao, Shandong, 266237, China*

<sup>b</sup> *State Key Laboratory of Microbial Technology, Microbial Technology Institute, Shandong University, Qingdao, Shandong, 266237, China*

<sup>c</sup> *College of Geography and Environment, Shandong Normal University, Jinan Shandong, 250014, China*

---

\* Corresponding author. Tel.: +86 532 58630936; Fax: +86 532 58360907  
E-mail address: songchao@sdu.edu.cn (Chao Song)

## SEM analysis

Briefly, NPs samples were first dispersed in water with sonication for 20 min, and then add dropwise onto an aluminium foil sheet. After desiccation, samples were sprayed with aurum for 240 seconds, and the surface morphologies of all samples were observed using a scanning electron microscope (JSM-7600F, JEOL, Japan).

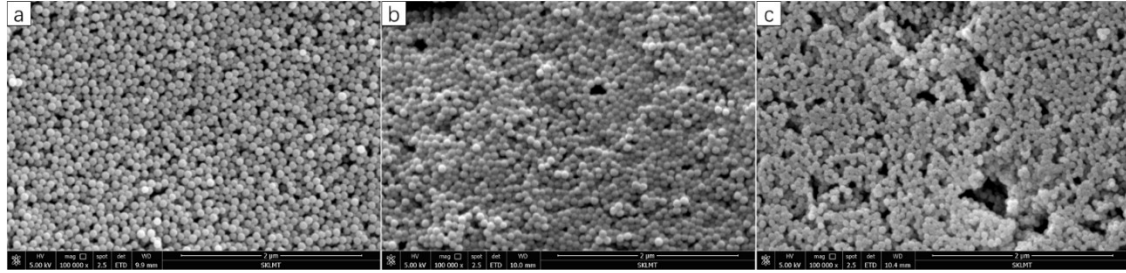

Figure S1 SEM images of NPs: (a) P-PS; (b) F-PS and (c) N-PS

## Water contact angles

Contact angle were measured with a optical contact angle goniometer (HARKE - SPCA, China) using a reported method.<sup>1</sup> Briefly, 0.1 g of nanoplastic powder was first flattened on a glass slide. Then, 5.0  $\mu\text{L}$  ultrapure water droplet was deposited onto the flattened nanoplastic, and the digital image of droplet was taken when the droplet reached a steady state on the substrate. All measurement were run at least nine independent times.

## Calculation of DLVO and XDLVO interaction energy

The classical Derjaguine-Landaue-Verweye-Overbeek (DLVO) theory was employed to calculate the interaction energies between NPs, and XDLVO theory was used for the interaction between NPs and quartz sand.<sup>2-6</sup>

Total interaction energy ( $\Phi_{\text{TOT}}$ ) of DLVO theory includes van der Waals interaction ( $\Phi_{\text{VDW}}$ ) and repulsive electrostatic double layer interactions ( $\Phi_{\text{EDL}}$ ):<sup>7</sup>

$$\Phi_{\text{TOT}} = \Phi_{\text{VDW}} + \Phi_{\text{EDL}} \quad (\text{S1})$$

The van der Waals interaction between NPs is obtained by the following equation:<sup>7</sup>

$$\Phi_{\text{VDW}} = -\frac{Ar_{\text{PS}}}{12h} \quad (\text{S2})$$

where  $r_{\text{PS}}$  is the radius of NPs (m),  $h$  is the separation distance of NPs-NPs (m),  $A$  is

the Hamaker constant of NPs-water system (J), which can be calculated as:<sup>8</sup>

$$A = 24\pi h_0^2 \left( \sqrt{\gamma_{PS}^{LW}} - \sqrt{\gamma_W^{LW}} \right)^2 \quad (S3)$$

where  $h_0$  is the minimum equilibrium distance between NPs (0.157nm),  $\gamma_{PS}^{LW}$  and  $\gamma_W^{LW}$  represent the Lifshitz-van der Waals interfacial tension values for nanoparticles and water. The value of  $\gamma_W^{LW}$  in this study is 21.8 mJ/m<sup>2</sup>. The  $\gamma_{PS}^{LW}$  of pristine/aged NPs can be calculated by the following equation:<sup>8</sup>

$$\gamma_i^L (1 + \cos \theta) = 2(\sqrt{\gamma_i^{LW} \gamma_{PS}^{LW}} + \sqrt{\gamma_i^+ \gamma_{PS}^-} + \sqrt{\gamma_i^- \gamma_{PS}^+}) \quad (S4)$$

where the subscripts i represents water ( $\gamma_W^L=72.8$ ,  $\gamma_W^{LW}=21.8$ ,  $\gamma_W^+ = \gamma_W^- = 25.5$  mJ/m<sup>2</sup>), glycerol ( $\gamma_g^L=64.0$ ,  $\gamma_g^{LW}=34.0$ ,  $\gamma_g^+ = 3.92$ ,  $\gamma_g^- = 57.4$  mJ/m<sup>2</sup>), or diiodomethane ( $\gamma_d^L=72.8$ ,  $\gamma_d^{LW}=21.8$ ,  $\gamma_d^+ = \gamma_d^- = 0$  mJ/m<sup>2</sup>), respectively.<sup>8</sup> The contact angles ( $\theta$ ) of NPs with three probing liquids were shown in Table S1. Using equation S4, we obtain the values of  $\gamma_{P-PS}^{LW}$ ,  $\gamma_{F-PS}^{LW}$ ,  $\gamma_{N-PS}^{LW}$ , which were 43.72, 45.30 and 46.78 mJ/m<sup>2</sup>, respectively. The Hamaker constants for P-PS, F-PS and N-PS in water system were  $6.99 \times 10^{-21}$ ,  $7.89 \times 10^{-21}$  and  $8.75 \times 10^{-21}$  J, respectively.

Table S1. The contact angles of NPs with three probing liquids

|      | $\theta_w$ | $\theta_g$ | $\theta_d$ |
|------|------------|------------|------------|
| P-PS | 104.3±1.0° | 82.0±0.7°  | 31.2±0.7 ° |
| F-PS | 92.5±0.9 ° | 73.0±0.8 ° | 27.3±0.4 ° |
| N-PS | 85.4±0.3 ° | 65.2±0.9 ° | 23.2±0.7 ° |

The  $\Phi_{EDL}$  between NPs can be calculated as:<sup>5</sup>

$$\Phi_{EDL} = 32\pi\epsilon_0\epsilon_r r_{PS} \left( \frac{k_B T}{ze} \right)^2 \tanh^2 \left( \frac{ze\phi}{4k_B T} \right) \exp(-\kappa h) \quad (S5)$$

where  $\epsilon_0$  is the vacuum permittivity ( $8.854 \times 10^{-12}$  C·V<sup>-1</sup>·m<sup>-1</sup>),  $\epsilon_r$  is the relative dielectric permittivity of water at 25 °C (78.4),  $k_B$  is the Boltzmann constant ( $1.38 \times 10^{-23}$  J/K),  $T$  is the Kelvin temperature (298 K),  $z$  is the valence of electrolyte,  $e$  is the elementary charge ( $-1.6 \times 10^{-19}$  C), and  $\kappa$  is the Debye length (m<sup>-1</sup>), defined as<sup>5</sup>

$$\kappa = \sqrt{\frac{2000 N_A e^2 I}{\varepsilon_0 \varepsilon_r k_B T}} \quad (S6)$$

$N_A$  is the Avogadro number ( $6.022 \times 10^{23} \text{ mol}^{-1}$ ),  $I$  is the ionic strength ( $1.0 \times 10^{-5} \text{ mol/L}$  NaCl for deionized water),  $\varphi$  is the surface charge of NPs, taking the zeta-potential ( $\zeta$ ) of NPs here.

The interaction energy of XDLVO theory ( $\Phi'_{TOT}$ ) is defined as the sum of three interactions,  $\Phi'_{VDW}$ ,  $\Phi'_{EDL}$  and Lewis acid-base interaction ( $\Phi'_{AB}$ ):<sup>7</sup>

$$\Phi'_{TOT} = \Phi'_{VDW} + \Phi'_{EDL} + \Phi'_{AB} \quad (S7)$$

$$\Phi'_{VDW} = -\frac{A' r_{PS}}{6h(1 + 14h/\lambda)} \quad (S8)$$

where  $h$  is the separation distance of NPs-sand (m),  $\lambda$  is the characteristic wavelength of 100 nm,<sup>6</sup>  $A'$  is the Hamaker constant of NPs-sand system, which can be calculated as:<sup>8</sup>

$$A' = 24\pi h_0^2 \left( \sqrt{\Upsilon_{PS}^{LW}} - \sqrt{\Upsilon_w^{LW}} \right) \left( \sqrt{\Upsilon_s^{LW}} - \sqrt{\Upsilon_w^{LW}} \right) \quad (S9)$$

where the  $\Upsilon_s^{LW}$  value in this study refers to previous literature (39.2 mJ/m<sup>2</sup>),  $\Phi'_{EDL}$  is calculated by the following equation:<sup>8</sup>

$$\Phi'_{EDL} = \pi r \varepsilon_0 \varepsilon_r \left\{ 2\varphi_1 \varphi_2 \ln \left[ \frac{1 + \exp(-\kappa h)}{1 - \exp(-\kappa h)} \right] + (\varphi_1^2 + \varphi_2^2) \ln [1 - \exp(-2\kappa h)] \right\} \quad (S10)$$

where  $\varphi_1$  and  $\varphi_2$  are the surface zeta-potentials of NPs and sand, respectively.

$\Phi'_{AB}$  can be calculated as:<sup>8</sup>

$$\Phi'_{AB} = 2\pi r_{PS} \lambda_w \Delta G_{h_0}^{AB} \exp \left( \frac{h_0 - h}{\lambda_w} \right) \quad (S11)$$

where  $\lambda_w$  is the characteristic decay length (1.0 nm) of acid-base interactions in water,  $h_0$  is the minimum equilibrium distance between NPs and sand surface (0.157 nm), and  $\Delta G_{h_0}^{AB}$  can be calculated as:<sup>8</sup>

$$\Delta G_{h_0}^{AB} = 2 \left[ \sqrt{\gamma_w^+} \left( \sqrt{\gamma_{PS}^-} + \sqrt{\gamma_s^-} - \sqrt{\gamma_w^-} \right) + \sqrt{\gamma_w^-} \left( \sqrt{\gamma_{PS}^+} + \sqrt{\gamma_s^+} - \sqrt{\gamma_w^+} \right) - \sqrt{\gamma_{PS}^- \gamma_s^+} - \sqrt{\gamma_{PS}^+ \gamma_s^-} \right] \quad (S12)$$

where the subscript w, NPs and s represent water, nanoparticles and sand,

respectively. The electron-accepting ( $\gamma_{PS}^+$ ) and electron-donating ( $\gamma_{PS}^-$ ) interfacial tension values of aging nanoplastics can be obtained from equation S6. The interfacial tension values in this study of  $\gamma_w^+ = \gamma_w^- = 25.5 \text{ mJ/m}^2$ ,  $\gamma_s^+ = 1.4 \text{ mJ/m}^2$ ,  $\gamma_s^- = 47.8 \text{ mJ/m}^2$ ,  $\gamma_{PS}^+ = 0.02 \text{ mJ/m}^2$  and  $\gamma_{PS}^- = 7.6 \text{ mJ/m}^2$  for NPs.<sup>8</sup>

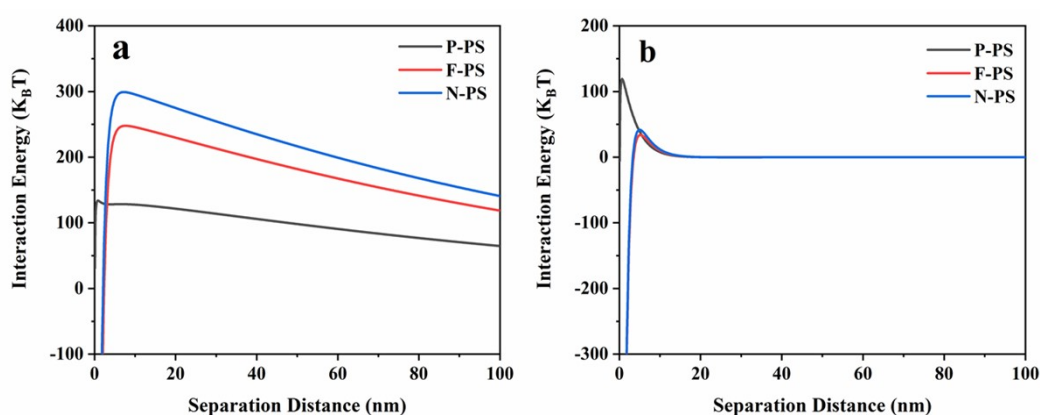

Figure S2 The XDLVO interaction energy profiles between NPs and sand in ultrapure water (a) and 10 mM NaCl solution (b)

## References:

1. Liu, P.; Qian, L.; Wang, H. Y.; Zhan, X.; Lu, K.; Gu, C.; Gao, S. X., New Insights into the aging behavior of microplastics accelerated by advanced oxidation processes. *Environ Sci Technol* **2019**, *53* (7), 3579-3588.
2. Han, Y.; Hwang, G.; Park, S.; Gomez-Flores, A.; Jo, E.; Eom, I.-C.; Tong, M.; Kim, H.-J.; Kim, H., Stability of carboxyl-functionalized carbon black nanoparticles: the role of solution chemistry and humic acid. *Environmental Science: Nano* **2017**, *4* (4), 800-810.
3. Hoek, E. M.; Agarwal, G. K., Extended DLVO interactions between spherical particles and rough surfaces. *J Colloid Interface Sci* **2006**, *298* (1), 50-8.
4. Hou, J.; Xu, X.; Lan, L.; Miao, L.; Xu, Y.; You, G.; Liu, Z., Transport behavior of micro polyethylene particles in saturated quartz sand: Impacts of input concentration and physicochemical factors. *Environ Pollut* **2020**, *263* (Pt B), 114499.
5. Xia, T.; Fortner, J. D.; Zhu, D.; Qi, Z.; Chen, W., Transport of Sulfide-Reduced Graphene Oxide in Saturated Quartz Sand: Cation-Dependent Retention Mechanisms. *Environ Sci Technol* **2015**, *49* (19), 11468-75.
6. Hu, E.; Shang, S.; Fu, Z.; Zhao, X.; Nan, X.; Du, Y.; Chen, X., Cotransport

of naphthalene with polystyrene nanoplastics (PSNP) in saturated porous media: Effects of PSNP/naphthalene ratio and ionic strength. *Chemosphere* **2020**, *245*, 125602.

7. Dong, Z.; Qiu, Y.; Zhang, W.; Yang, Z.; Wei, L., Size-dependent transport and retention of micron-sized plastic spheres in natural sand saturated with seawater. *Water Res* **2018**, *143*, 518-526.
8. Liu, J.; Zhang, T.; Tian, L.; Liu, X.; Qi, Z.; Ma, Y.; Ji, R.; Chen, W., Aging Significantly Affects Mobility and Contaminant-Mobilizing Ability of Nanoplastics in Saturated Loamy Sand. *Environ Sci Technol* **2019**, *53* (10), 5805-5815.
